# Supplementary material
Source: PubMed Central journal article supplement (PMC3153082)
Supplement: NIHMS254181-supplement-si.pdf [file NIHMS254181-supplement-si.pdf]

**CHEMBIOCHEM**

## Supporting Information

© Copyright Wiley-VCH Verlag GmbH & Co. KGaA, 69451 Weinheim, 2009

# Supporting Information

for

Synthesis, Conjugation, and Immunological Evaluation of the Serogroup 6  
Pneumococcal Oligosaccharides

Archana R. Parameswar, In ho Park, Rina Saksena, Pavol Kováč,  
Moon H. Nahm, and Alexei V. Demchenko\*

## Additional Experimental and Characterization Data

**General:** Column chromatography was performed on silica gel 60 (70-230 mesh), reactions were monitored by TLC on Kieselgel 60 F254. Reversed-phase purifications were carried out on Strata- X tubes (Phenomenex, 33  $\mu\text{m}$  polymeric reverse phase). The compounds were detected under UV light and by charring with 10% sulfuric acid in methanol. Solvents were removed under reduced pressure at  $< 40\text{ }^{\circ}\text{C}$ .  $\text{ClCH}_2\text{CH}_2\text{Cl}$  was distilled from  $\text{CaH}_2$  directly prior to application. Methanol was dried by refluxing with magnesium methoxide, distilled and stored under argon. Pyridine was dried by refluxing with  $\text{CaH}_2$ , distilled, and stored over molecular sieves (3  $\text{\AA}$ ). Anhydrous DMF and diethyl ether were used as received. Molecular sieves (3  $\text{\AA}$  or 4  $\text{\AA}$ ), used for reactions, were crushed and activated in vacuo for 8 h at  $390\text{ }^{\circ}\text{C}$  in the first instance and then for 2-3 h at  $390\text{ }^{\circ}\text{C}$  directly prior to each application. AgOTf was co-evaporated with toluene (3 x 10 mL) and dried in vacuo for 2-3 h directly prior to application. For ultrafiltration of conjugates, a centrifugal filter device (Amicon Ultra-15) was used. Optical rotations were measured at 'Jasco P-1020' polarimeter. Unless noted otherwise,  $^1\text{H}$  NMR spectra were recorded in  $\text{CDCl}_3$  at 300 MHz (Bruker Avance),  $^{13}\text{C}$ -NMR spectra were recorded in  $\text{CDCl}_3$  at 75 MHz (Bruker Avance) or at 125 MHz (Bruker ARX-500). HRMS spectra were measured at JEOL MStation (JMS-700) Mass Spectrometer. SELDI-TOF was measured using NP-20 Protein-Chip<sup>®</sup> arrays and Bio-Rad Laboratories Inc instrument using Protein Chip data Manager Software 3.0.7.

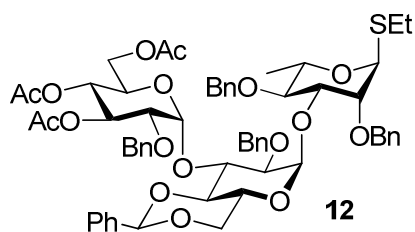

**Ethyl O-(2-O-benzyl-3,4,6-tri-O-acetyl- $\alpha$ -D-glucopyranosyl)-(1 $\rightarrow$ 3)-O-(2-O-benzyl-4,6-O-benzylidene- $\alpha$ -D-glucopyranosyl)-(1 $\rightarrow$ 3)-2,4-di-O-benzyl-1-thio- $\alpha$ -L-rhamnopyranoside (12).** The title compound was obtained by Method A from benzoxazolyl 3,4,6-tri-O-acetyl-2-O-benzyl-1-thio- $\beta$ -D-glucopyranoside **4** and **11** in 60% yield. Analytical data:  $R_f = 0.55$  (ethyl acetate - hexanes, 2:3, v/v);  $[\alpha]_D^{25} +75.0^\circ$  (c = 1.0,  $\text{CHCl}_3$ );  $^1\text{H NMR}$ :  $\delta$ , 1.19 (t, 3H,  $\text{CH}_2\text{CH}_3$ ), 1.36 (d, 3H, H-6), 1.90, 1.93, 1.99 (3s, 9H, 3 x  $\text{COCH}_3$ ), 2.55-2.69 (q, 2H,  $\text{CH}_2\text{CH}_3$ ), 3.35 (dd, 1H,  $J_{2'',3''} = 3.6$  Hz, H-2''), 3.57-3.79 (m, 6H, H-3, 2', 4', 6b', 6a''', 6b'''), 4.07-4.14 (m, 5H, H-2, 5, 5', 6a',  $\frac{1}{2}$   $\text{CH}_2\text{Ph}$ ), 4.21 (dd, 1H,  $J_{4,5} = 4.8$  Hz, H-4), 4.33-4.39 (m, 2H, H-3', 5''), 4.44-4.50 (m, 2H,  $\text{CH}_2\text{Ph}$ ), 4.61-4.71 (m, 4H, 2 x  $\text{CH}_2\text{Ph}$ ), 4.82 (dd, 1H,  $J_{4'',5''} = 3.8$  Hz, H-4''), 4.99 (d, 1H,  $\frac{1}{2}$   $\text{CH}_2\text{Ph}$ ), 5.27 (d, 1H,  $J_{1',2'} = 3.5$  Hz, H-1'), 5.37-5.44 (m, 3H, H-1, 3'',  $\text{CHPh}$ ), 5.49 (dd, 1H,  $J_{1'',2''} = 3.6$  Hz, H-1''), 6.79-7.45 (m, 25H, aromatic) ppm;  $^{13}\text{C NMR}$ :  $\delta$ , 15.7, 18.5, 21.3, 21.4, 21.5, 26.1, 30.3, 61.9, 63.2, 67.4, 68.7, 69.2, 69.6, 71.2, 72.1, 72.8, 72.9, 73.9, 75.7, 75.9, 76.4, 80.6, 81.8, 83.1, 94.5, 96.3, 102.9, 127.2 (x 2), 127.8 (x 2), 128.2, 128.3 (x 2), 128.4, 128.6, 128.7 (x 2), 128.8 (x 2), 128.9 (x 2), 129.0 (x 2), 129.06 (x 2), 129.08 (x 3), 129.1 (x 2), 129.3, 130.0, 137.7, 137.8, 137.9, 138.4, 138.7, 170.3, 170.7, 171.3, ppm; HR-FAB MS  $[\text{M}+\text{H}]^+$  calcd for  $\text{C}_{61}\text{H}_{70}\text{O}_{17}\text{SNa}$  1129.4231, found 1129.4238.

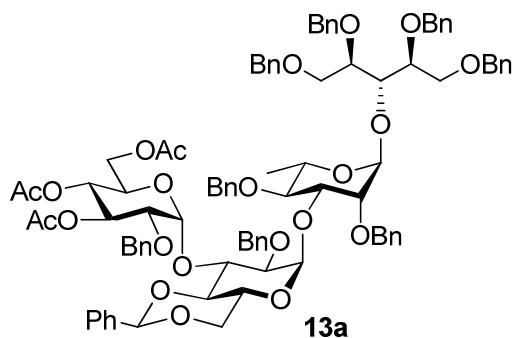

**O-(3,4,6-Tri-O-acetyl-2-O-benzyl- $\alpha$ -D-glucopyranosyl)-(1 $\rightarrow$ 3)-O-(2-O-benzyl-4,6-O-benzylidene- $\alpha$ -D-glucopyranosyl)-(1 $\rightarrow$ 3)-O-(2,4-di-O-benzyl- $\alpha$ -L-rhamnopyranosyl)-(1 $\rightarrow$ 3)-1,2,4,5-tetra-O-benzyl-D-ribose (13a).** The title compound was ob-

tained by Method B from **9** and **12** in 89% yield. Analytical data for **13a**:  $R_f = 0.46$  (ethyl acetate - hexanes, 2:3, v/v);  $[\alpha]_D^{25} +55.4^\circ$  (c = 1.0, CHCl<sub>3</sub>); <sup>1</sup>H NMR:  $\delta$ , 1.18 (d, 3H, H-6'), 1.80, 1.84, 1.90 (3s, 3H, 3 x COCH<sub>3</sub>), 3.27 (dd,  $J_{2''',3'''} = 3.6$  Hz, H-2'''), 3.50-3.70 (m, 10H, H-1, 5, 4', 2'', 6a'', 6b'', 6a''', 6b'''), 3.75-3.79 (m, 1H, H-5'), 3.85-3.87 (m, 1H, H-2'), 3.90-3.95 (m, 1H, H-4''), 4.00-4.06 (m, 5H, H-2, 3', 3'',  $\frac{1}{2}$  CH<sub>2</sub>Ph), 4.21-4.33 (m, 5H, H-3, 4, 5''', CH<sub>2</sub>Ph), 4.35-4.52 (m, 9H, 4.5 x CH<sub>2</sub>Ph), 4.57-4.61 (m, 3H, 1.5 x CH<sub>2</sub>Ph), 4.71 (dd, 1H,  $J_{4''',5'''} = 10.2$  Hz, H-4'''), 4.93 (d, 1H,  $\frac{1}{2}$  CH<sub>2</sub>Ph), 5.12-5.14 (m, 2H, H-1', 1'''), 5.28-5.34 (m, 2H, H-3''', CHPh), 5.40 (d, 1H,  $J_{1'',2''} = 3.5$  Hz, H-1''), 6.72-7.34 (m, 45H, aromatic) ppm; <sup>13</sup>C NMR:  $\delta$ , 18.2, 20.8, 20.9, 21.0, 61.5, 62.5, 66.9, 68.2, 69.1, 70.1, 70.3, 70.6, 71.7, 71.9, 72.1, 72.4, 72.8, 73.5, 73.6 (x 2), 74.5, 74.6, 75.3, 75.7, 78.0, 78.5, 78.7, 79.5, 82.7, 92.9, 95.8, 98.5, 102.5, 126.8 (x 2), 127.4 (x 2), 127.5 (x 3), 127.6 (x 3), 127.7 (x 4), 127.8 (x 2), 127.9 (x 3), 128.0, 128.1 (x 2), 128.2 (x 2), 128.3 (x 3), 128.4 (x 6), 128.5 (x 6), 128.6 (x 6), 129.6, 137.3, 137.4, 137.5, 138.1, 138.3, 138.4, 138.5, 138.6, 138.7, 169.9, 170.3, 170.8 ppm; HR-FAB MS  $[M+Na]^+$  calcd for C<sub>92</sub>H<sub>100</sub>O<sub>22</sub>Na 1579.6604, found 1579.6609.

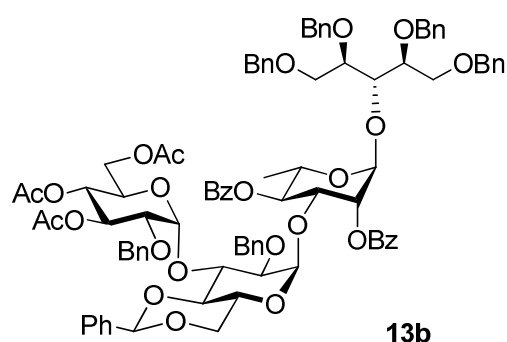

**O-(3,4,6-Tri-O-acetyl-2-O-benzyl- $\alpha$ -D-glucopyranosyl)-(1 $\rightarrow$ 3)-O-(2-O-benzyl-4,6-O-benzylidene- $\alpha$ -D-glucopyranosyl)-(1 $\rightarrow$ 3)-O-(2,4-di-O-benzoyl- $\alpha$ -L-rhamnopyranosyl)-(1 $\rightarrow$ 3)-1,2,4,5-tetra-O-benzyl-D/L-ribose (**13b**).** The title compound was obtained by Method B from **14** and **15** in 66% yield. Analytical data for **13b**:  $R_f = 0.41$  (ethyl acetate - hexanes, 2:3, v/v);  $[\alpha]_D^{25} +55.6^\circ$  (c = 1.0, CHCl<sub>3</sub>); <sup>1</sup>H NMR:  $\delta$ , 1.09 (d, 3H, H-6'), 1.80, 1.94, 1.99 (3s, 3H, 3 x COCH<sub>3</sub>), 3.24 (dd,  $J_{2''',3'''} = 3.5$  Hz, H-2'''), 3.45-3.59 (m, 4H, H-2, 5, 2''), 3.67-3.82 (m, 7H, H-1, 5'', 6a'', 6b'', 6a''', 6b'''), 3.87-3.90 (m, 1H, H-4''), 3.94-4.00 (m, 3H, H-3, 4, 3''), 4.11-4.13 (m, 1H,  $J_{5''',6a'''} = 10.4$  Hz, H-5'''), 4.24-4.31 (m, 3H, H-5', CH<sub>2</sub>Ph), 4.35-4.40 (m, 1H, H-3'), 4.45-4.74 (m, 11H, H-4''', 5 x CH<sub>2</sub>Ph), 5.13 (d, 1H,  $J_{1'',2''} = 3.4$  Hz, H-1''), 5.21-5.27 (m, 4H, H-1', 1''', 3''', CHPh), 5.58-5.64 (m, 2H, H-2', 4'), 6.70-8.12 (m, 45H, aromatic) ppm; <sup>13</sup>C NMR:  $\delta$ ,

17.8, 20.7, 20.9, 21.0, 29.9, 61.3, 62.6, 66.9, 67.8, 67.9, 68.9, 69.3, 70.3, 70.6, 71.6, 72.3 (x 2), 72.7, 73.4 (x 2), 75.2, 78.1, 82.5, 94.6, 95.5, 97.8, 102.2, 126.8 (x 3), 127.4 (x 3), 127.7 (x 8), 127.9 (x 3), 128.0 (x 4), 128.1 (x 8), 128.3 (x 5), 128.5 (x 8), 128.8 (x 3), 129.5, 129.6, 129.8, 129.9 (x 2), 130.2 (x 2), 133.4, 133.7, 137.2, 137.3, 137.5, 138.5 (x 2), 138.6, 163.3, 165.7, 166.1, 169.8, 170.2, 170.8 ppm; HR-FAB MS  $[M+Na]^+$  calcd for  $C_{92}H_{96}O_{24}Na$  1607.6189, found 1607.6172.

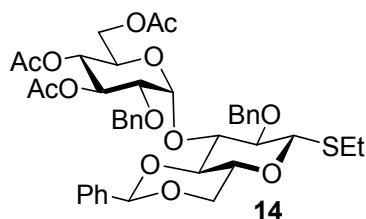

**Ethyl O-(3,4,6-Tri-O-acetyl-2-O-benzyl- $\alpha$ -D-glucopyranosyl)-(1 $\rightarrow$ 3)-2-O-benzyl-4,6-O-benzylidene-1-thio- $\beta$ -D-glucopyranoside (14).** The title compound was obtained by Method A from Benzoxazolyl 3,4,6-tri-O-acetyl-2-O-benzyl-1-thio- $\beta$ -D-glucopyranoside **4** and ethyl 2-O-benzyl-4,6-O-benzylidene-1-thio- $\beta$ -D-glucopyranoside **6** in 72% yield. Analytical data:  $R_f$  = 0.5 (ethyl acetate – hexanes, 2:3, v/v);  $[\alpha]_D^{25}$  +85.9° (c = 1,  $CHCl_3$ ); m.p. 74-76 °C;  $^1H$  NMR:  $\delta$ , 1.35 (t, 3H,  $CH_2CH_3$ ), 1.93, 1.95, 1.99 (3s, 9H, 3 x  $COCH_3$ ), 2.71-2.90 (m, 2H,  $CH_2CH_3$ ), 3.38 (dd, 1H,  $J_{2',3'} = 3.6$  Hz, H-2'), 3.49-3.59 (m, 2H, H-2, 6a), 3.65 (dd, 2H,  $J_{6a',6b'} = 1.9$  Hz, H-6a', H-6b'), 3.73-3.87 (m, 2H, H-4, 5), 4.08-4.19 (m, 3H, H-6b, 5',  $\frac{1}{2} CH_2Ph$ ), 4.34 (dd, 1H,  $J_{3,4} = 4.9$  Hz, H-3), 4.54 (d, 1H,  $\frac{1}{2} CH_2Ph$ ), 4.65 (d, 1H,  $J_{1,2} = 9.47$  Hz, H-1), 4.69 (d, 1H,  $\frac{1}{2} CH_2Ph$ ), 4.84 (dd, 1H,  $J_{3',4'} = 9.9$  Hz, H-4'), 5.13 (d, 1H,  $\frac{1}{2} CH_2Ph$ ), 5.40-5.46 (m, 2H, H-3',  $CHPh$ ), 5.63 (d, 1H,  $J_{1',2'} = 3.5$  Hz, H-1'), 6.85-7.43 (m, 15H, aromatic) ppm;  $^{13}C$  NMR:  $\delta$ , 15.2, 20.7, 20.8, 21.0, 25.3, 60.5, 61.2, 67.1, 68.0, 68.9, 70.1, 70.9, 71.5, 75.3, 75.8, 79.5, 82.2, 86.1, 95.8, 102.4, 126.6 (x 2), 127.4, (x 4), 127.8 (x 3), 128.4, 128.5 (x 3), 128.6 (x 3), 129.7, 137.1, 137.4, 137.8, 169.7, 170.2, 170.7, ppm; HR-FAB MS  $[M+Na]^+$  calcd for  $C_{41}H_{48}O_{13}SNa$  803.2713, found 803.2722.

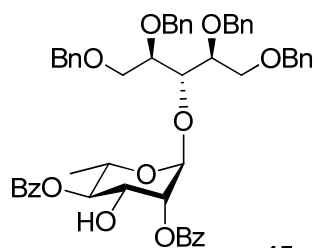

15

**3-O-(2,4-Di-O-benzoyl- $\alpha$ -L-rhamnopyranosyl)-1,2,4,5-tetra-O-benzyl-D/L-ribitol**

**(15).** The title compound was obtained by Method B from **7** and **9** in 65% yield. Analytical data:  $R_f = 0.42$  (ethyl acetate – hexanes, 3/7, v/v);  $[\alpha]_D^{25} -8.3^\circ$  ( $c = 1$ ,  $\text{CHCl}_3$ );  $^1\text{H NMR}$ :  $\delta$ , 1.04 (d, 3H, H-6'), 3.56-3.70 (d, 4H, H-1, 5), 3.76-3.79 (m, 1H, H-2), 3.88-3.91 (m, 1H, H-4), 4.08-4.20 (m, 3H, H-3, 3', 5'), 4.37-4.59 (m, 8H, 4 x  $\text{CH}_2\text{Ph}$ ), 5.05-5.16 (m, 2H, H-1', 4'), 5.27-5.29 (m, 1H, H-2'), 7.04-8.03 (m, 30H, aromatic) ppm;  $^{13}\text{C NMR}$ :  $\delta$ , 18.1, 67.4, 69.0, 69.5, 70.6, 70.7, 72.5, 72.6, 72.7, 73.7 (x 2), 73.9, 74.0, 76.1, 78.4, 78.6, 97.8, 128.0 (x 2), 128.1 (x 2), 128.2, 128.3 (x 2), 128.4(x 4), 128.5 (x 2), 128.8 (x 4), 128.9 (x 3), 129.0 (x 2), 129.1 (x 2), 130.0, 130.1, 130.4 (x 2), 130.5 (x 2), 138.8 (x 2), 138.9, 139.0, 166.5, 167.7 ppm; HR-FAB MS  $[\text{M}+\text{Na}]^+$  calcd for  $\text{C}_{53}\text{H}_{54}\text{O}_{11}\text{Na}$  889.3564, found 889.3577.

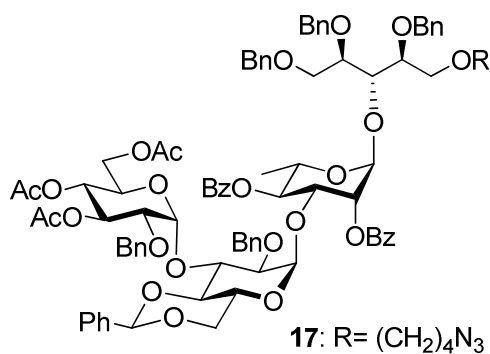

17: R =  $(\text{CH}_2)_4\text{N}_3$

**O-(3,4,6-Tri-O-acetyl-2-O-benzyl- $\alpha$ -D-glucopyranosyl)-(1→3)-O-(2-O-benzyl-4,6-O-benzylidene- $\alpha$ -D-glucopyranosyl)-(1→3)-O-(2,4-di-O-benzoyl- $\alpha$ -L-rhamnopyranosyl)-(1→3)-1-O-(4-azidobutyl)-2,4,5-tri-O-benzyl-D-ribitol (17).** The title compound was obtained by Method B from **14** and **16** in 74% yield. Analytical data for **17**:  $R_f = 0.41$  (ethyl acetate - hexanes, 2:3, v/v);  $[\alpha]_D^{25} +55.6^\circ$  ( $c = 1.0$ ,  $\text{CHCl}_3$ );  $^1\text{H NMR}$ :  $\delta$ , 1.22 (d, 3H, H-6'), 1.64-1.68 (m, 4H, 2 x  $\text{CH}_2\text{sp}$ ), 1.82, 1.96, 2.01 (3s, 3H, 3 x  $\text{COCH}_3$ ), 3.24-3.28 (m, 3H, H-2''',  $\text{CH}_2\text{sp}$ ), 3.40-3.45 (m, 2H,  $\text{CH}_2\text{sp}$ ), 3.48-3.62 (m, 4H, H-2, 5, 2''), 3.70-3.85 (m, 7H, H-1, 5'', 6a'', 6b'', 6a''', 6b'''), 3.91-3.95 (m, 2H, H-4, 4''), 3.98-4.03 (m, 2H, H-3, 3''), 4.11-4.14 (m, 1H, H-5'''), 4.25-4.33 (m, 2H, H-5',  $\frac{1}{2}$

$\text{CH}_2\text{Ph}$ ), 4.38-4.43 (m, 2H, H-3',  $\frac{1}{2}$   $\text{CH}_2\text{Ph}$ ), 4.50-4.54 (m, 2H,  $\text{CH}_2\text{Ph}$ ), 4.68-4.78 (m, 7H, H-4''', 3 x  $\text{CH}_2\text{Ph}$ ), 5.16 (d, 1H,  $J_{1'',2''} = 3.5$  Hz, H-1''), 5.23-5.30 (m, 4H, H-1', 1''', 3''',  $\text{CHPh}$ ), 5.64-5.68 (m, 2H, H-2',4'), 6.75-8.16 (m, 45H, aromatic) ppm;  $^{13}\text{C}$  NMR:  $\delta$ , 17.8, 20.7, 20.9, 21.0, 26.0, 27.1, 51.4, 61.2, 62.6, 66.9, 68.8, 68.9, 68.9, 69.1, 70.6, 70.8, 70.9, 71.6, 72.1, 72.2, 72.4, 72.7, 73.4, 75.2, 77.9, 82.4, 94.5, 95.5, 97.8, 102.2, 126.8 (x 2), 127.4 (x 3), 127.7 (x 2), 127.8 (x 5), 127.9 (x 3), 128.0 (x 5), 128.1 (x 5), 128.3 (x 5), 128.5 (x 5), 128.8 (x 3), 129.5, 129.6, 129.7, 129.9 (x 2), 130.2 (x 2), 133.4, 133.7, 137.1, 137.3, 137.5, 138.4 (x 2), 138.5, 165.7, 166.1, 169.9, 170.2, 170.8 ppm; HR-FAB MS  $[\text{M}+\text{Na}]^+$  calcd for  $\text{C}_{89}\text{H}_{97}\text{N}_3\text{O}_{24}\text{Na}$  1614.6360 found 1614.6372.
